# Supplementary material
Source: PubMed Central journal article supplement (PMC3497188)

## Supplemental information:

### Supplemental figure legends:

**Supplemental Figure 1:** Phylogenetic tree constructed using the program clustalw (<http://clustalw.genome.jp/>) showing the similarity between the different classes of chitin synthases among Basidiomycetes and Ascomycetes. Abbreviations: Af=*Aspergillus fumigatus*; An=*Aspergillus nidulans*; Ao=*Aspergillus oryzae*; Um=*Ustilago maydis*; Cn=*Cryptococcus neoformans*; Bf=*Botryotinia fuckeliana*; Fo=*Fusarium oxysporum*; Ed=*Exophiala dermatitidis*.

**Supplemental Figure 2:** Targeted replacement of *A. fumigatus* *CSMA* and *CSMB* genes. **(A)**. Physical maps of the genomic regions and strategy for the construction of the different disruption vectors designated as pCJ-E1, pCJ-Eb2, pCJ-D2 and pCJ-F4. **(B)**. Analysis of the transformants A30 ( $\Delta csmA$ ), B1 and B7 ( $\Delta csmB$ ), D22 and D78 ( $\Delta csmA/\Delta csmB$ ) by Southern blotting.

**Supplemental Figure 3:** Construction of the  $\Delta csmA/\Delta csmB$  strain by using the self excising  $\beta$ -rec/six blaster cassette in a  $\Delta akuB^{KU80}$  background: **(A)**. Schematic representation of genotypes after *CSMA* replacement, subsequent marker excision and *CSMB* replacement. Restriction sites and hybridizing probe (black bar) are schematically indicated; **(B)**. Southern analysis of the genomic DNA isolated from corresponding  $\Delta csmA$  and  $\Delta csmAx$  strains. The calculated sizes of hybridization signals by using the probe 1 are specified of DNA fragments are specified; **(C)**. Southern analysis of the genomic DNA isolated from corresponding  $\Delta csmAx/\Delta csmB$  strains. The calculated sizes of hybridization signals by using the probe 2 are specified.

**Supplemental Figure 4:** Ectopic integration of the *CSMA* and *CSMB* genes in the single and double mutants. R1: mutant  $\Delta csmA$  transformed with *CSMA*; S5: mutant  $\Delta csmB$  transformed with *CSMB*; pB1, pB4 y pB7: double mutant  $\Delta csmA/\Delta csmB$  transformed with *CSMB* (genotype  $\Delta csmA/CSMB$ ); pA1, pA3 double mutant  $\Delta csmA/\Delta csmB$  transformed with *CSMA* (genotype  $CSMA/\Delta csmB$ ). Panel A is hybridized with a *CSMB* probe and Panel B with a *CSMA* probe after digestion of the genomic DNA with *XhoI*, *EcoRI* and *SpeI*.

**Supplemental Figure 5:** Expression of all chitin synthase genes in the vegetative mycelium grown for 16 h in YG medium.

**Supplemental Figure 6:** Expression of all chitin synthase genes in the conidiating mycelia (grown for 24 h in aerial conditions) of the parental,  $\Delta csmA$  and  $\Delta csmA/\Delta csmB$  strains.

**Supplemental Figure 7:** **(A)**. Sizes of the colonies of the  $\Delta csmA$ ,  $\Delta csmB$ ,  $\Delta csmA/\Delta csmB$  and parental strains when 10-months old (1-3) or 2-weeks old conidia (4-6) were spotted on the malt-agar at three different concentrations (per spot: 1 & 4 – 5000, 2 & 4 – 2500 and 3 & 6 – 1250 conidia, respectively). Note that the colony diameter of the  $\Delta csmA/\Delta csmB$  double mutant was highly reduced with 10-month old conidia due to the loss of viability of the conidia over storage **(B)**. Survival of the conidia during storage of the slants over time at RT.

**Supplemental Figure 8:** **(A)**. Ten-fold conidial dilutions ( $2 \times 10^6$ ) of the  $\Delta csm$  mutants and the parental strains were spotted on YG plates with 0.1  $\mu\text{g/ml}$  of caspofungin (CAS), anidulafungin (ANF) and micafungin (MCF). Plates were incubated 3-days at 28°C; **(B)**.

Sensitivity of the  $\Delta csm$  mutants and the parental strains to other drugs (itraconazole, voriconazole and amphotericin B (AMB)) and calcofluor white. Selected concentrations showing an inhibitory effect are presented. YG plates were incubated 48 h at 37°C.

**Supplemental Figure 9:** Lack of correlation between the phenotypes of the *CHS* mutant and their affiliation to a family defined by BLAST homologies. The bar-graph showed the number of  $\Delta chs$  mutants generated in the Ascomycetes, Basidiomycetes, yeasts and these mutants with phenotypes.

**Supplemental Table 1:** Primers used to construct the  $\Delta cms$  mutant strains and to verify the complementation of the  $\Delta cmsA/\Delta csmB$  double mutant strain

| <b>Primers used for the deletion of CSMA and CSMB (Strategy 1)</b>                               |                                                                            |
|--------------------------------------------------------------------------------------------------|----------------------------------------------------------------------------|
| AfV-A1                                                                                           | 5'-TAGCGGCCGCGTCCCTAGCACCTAATATTCC-3'<br><i>NotI</i>                       |
| AfV-A2                                                                                           | 5'-TCGATGGATCCTATCTAGAGAGAAATGCCGCGTAAGATAG-3'<br><i>BamHI</i> <i>XbaI</i> |
| AfV-A5                                                                                           | 5'-GCTAAGGATCCATGTTAACGATTCCAATGCAACAGCTTTG-3'<br><i>BamHI</i> <i>HpaI</i> |
| AfV-A6                                                                                           | 5'-AAGCGGCCGCGGATACATTAGCCGCTGC-3'<br><i>NotI</i>                          |
| AfVB-B1                                                                                          | 5'-TTGCGGCCGCGACCTAGGTCTGAAGCGTTTGG-3'<br><i>NotI</i>                      |
| AfVB-B2                                                                                          | 5'-CGATCGGATCCAGTCTAGAGTACCTGATCTACCGTGTCGC-3'<br><i>BamHI</i> <i>XbaI</i> |
| AfVB-B5                                                                                          | 5'-GCTAAGGATCCATGTTAACGAGGACGTCACAAGATA-3'<br><i>BamHI</i> <i>HpaI</i>     |
| AfVB-B6                                                                                          | 5'-AAGCGGCCGCGCAAAGTCTGGTACTGTCC-3'<br><i>NotI</i>                         |
| <b>Primers used for the deletion of CSMA and CSMB (Strategy 2)</b>                               |                                                                            |
| 5'csmAforw                                                                                       | 5'-AATTCGAGCTCGGTACTGCGCACCTAATATTCCTAAGAGTTC-3'                           |
| 5'csmArev                                                                                        | 5'-GGACCTGAGTGATGCTTCAAATCTGAGTACGAATAATG-3'                               |
| csmA3'forw                                                                                       | 5'-TGGTCCATCTAGTGCATCGCCTCATCCACTGAGAATGG-3'                               |
| csmA3'rev                                                                                        | 5'-GCCAAGCTTGCATGCCTGCGCAGAATGGAAAGATGACATCGTCC-3'                         |
| forw csmA                                                                                        | 5'TCAGATTTGAAGCACCTCCG3'                                                   |
| 5'csmBforw                                                                                       | 5'AATTCGAGCTCGGTACTGCGCACGATCCGCACCCCAAAC3'                                |
| 5'csmBrev                                                                                        | 5'GGACCTGAGTGATGCTTGGCTTTCACGATGACCC3'                                     |
| csmB3'forw                                                                                       | 5'TGGTCCATCTAGTGCCATGCGATTTGTGGTACTGG3'                                    |
| csmB3'rev                                                                                        | 5'GCCAAGCTTGCATGCCTGC GCAGCCGTTGTTCCACC3'                                  |
| forw csmB                                                                                        | 5'TGTCTATTCAGTCATTCAGC3'                                                   |
| Sv630                                                                                            | 5'-TCGGAGAACACCTTGCTGACG3'                                                 |
| <b>Primers used to verify complementation of the <math>\Delta cmsA/\Delta csmB</math> mutant</b> |                                                                            |
| sE_F                                                                                             | GATACCTACAACCTTCCTACC                                                      |
| sE_R                                                                                             | CATCTCTAGCTCCAGCGG                                                         |
| sEb_F                                                                                            | CAGCCGTGATCTCGATGG                                                         |
| sEb_R                                                                                            | GTTTCATAGAACCAGTCAGG                                                       |

**Supplemental Table 2:** Primers used for Quantitative RT-PCR

| <b>Name</b>                  | <b>Sequence</b>          |
|------------------------------|--------------------------|
| <i>CHSAa</i> (AFUA_2G01870)  | ATGCGACGGATGATGACAGG     |
| <i>CHSAb</i> (AFUA_2G01870)  | ACGACCAGGAACCACATTGC     |
| <i>CHSBa</i> (A FUA_4G04180) | GCGGCGGACTGGACAAGG       |
| <i>CHSBb</i> (A FUA_4G04180) | ACAATGGAGCAGGTGGCAAGG    |
| <i>CHSCa</i> (AFUA_5G00760)  | GGTGCCGAGTGCGATTCAG      |
| <i>CHSCb</i> (A FUA_5G00760) | CGTAGGTTGTAGCCGTTGCG     |
| <i>CHSDa</i> (A FUA_1G12600) | GGACCGAGAGCCGATGCC       |
| <i>CHSDb</i> (A FUA_1G12600) | GCCTTGAGCCTTAGCCAGTTC    |
| <i>CSMAa</i> (A FUA2G13440)  | TGTCATTGTCAAGGTCGGAAAGC  |
| <i>CSMAb</i> (A FUA_2G13440) | CACGGTTCAGGAATCTCATCAGC  |
| <i>CSMBa</i> (A FUA_2G13430) | AGGAGGGCGGAGGATGGATG     |
| <i>CSMBb</i> (A FUA_2G13430) | CAAGTGCGGTGAAGGCTATGC    |
| <i>CHSFa</i> (A FUA_8G05630) | ACTTTGACCTTCTGAACTGGCTTG |
| <i>CHSFb</i> (A FUA_8G05630) | TCCTCTTATCTTCTCCCGCTTGG  |
| <i>CHSGa</i> (A FUA_3G14420) | TGGTGCGTGCCTTCAGTGG      |
| <i>CHSGb</i> (A FUA_3G14420) | ACCGAATGTAGCAGCGAGAGC    |
| <i>TEFa</i> (A FUA_1G06390)  | CCATGTGTGTCGAGTCCTTC     |
| <i>TEFb</i> (A FUA_1G06390)  | GAACGTACAGCAACAGTCTGG    |

**Supplemental Figure 1**

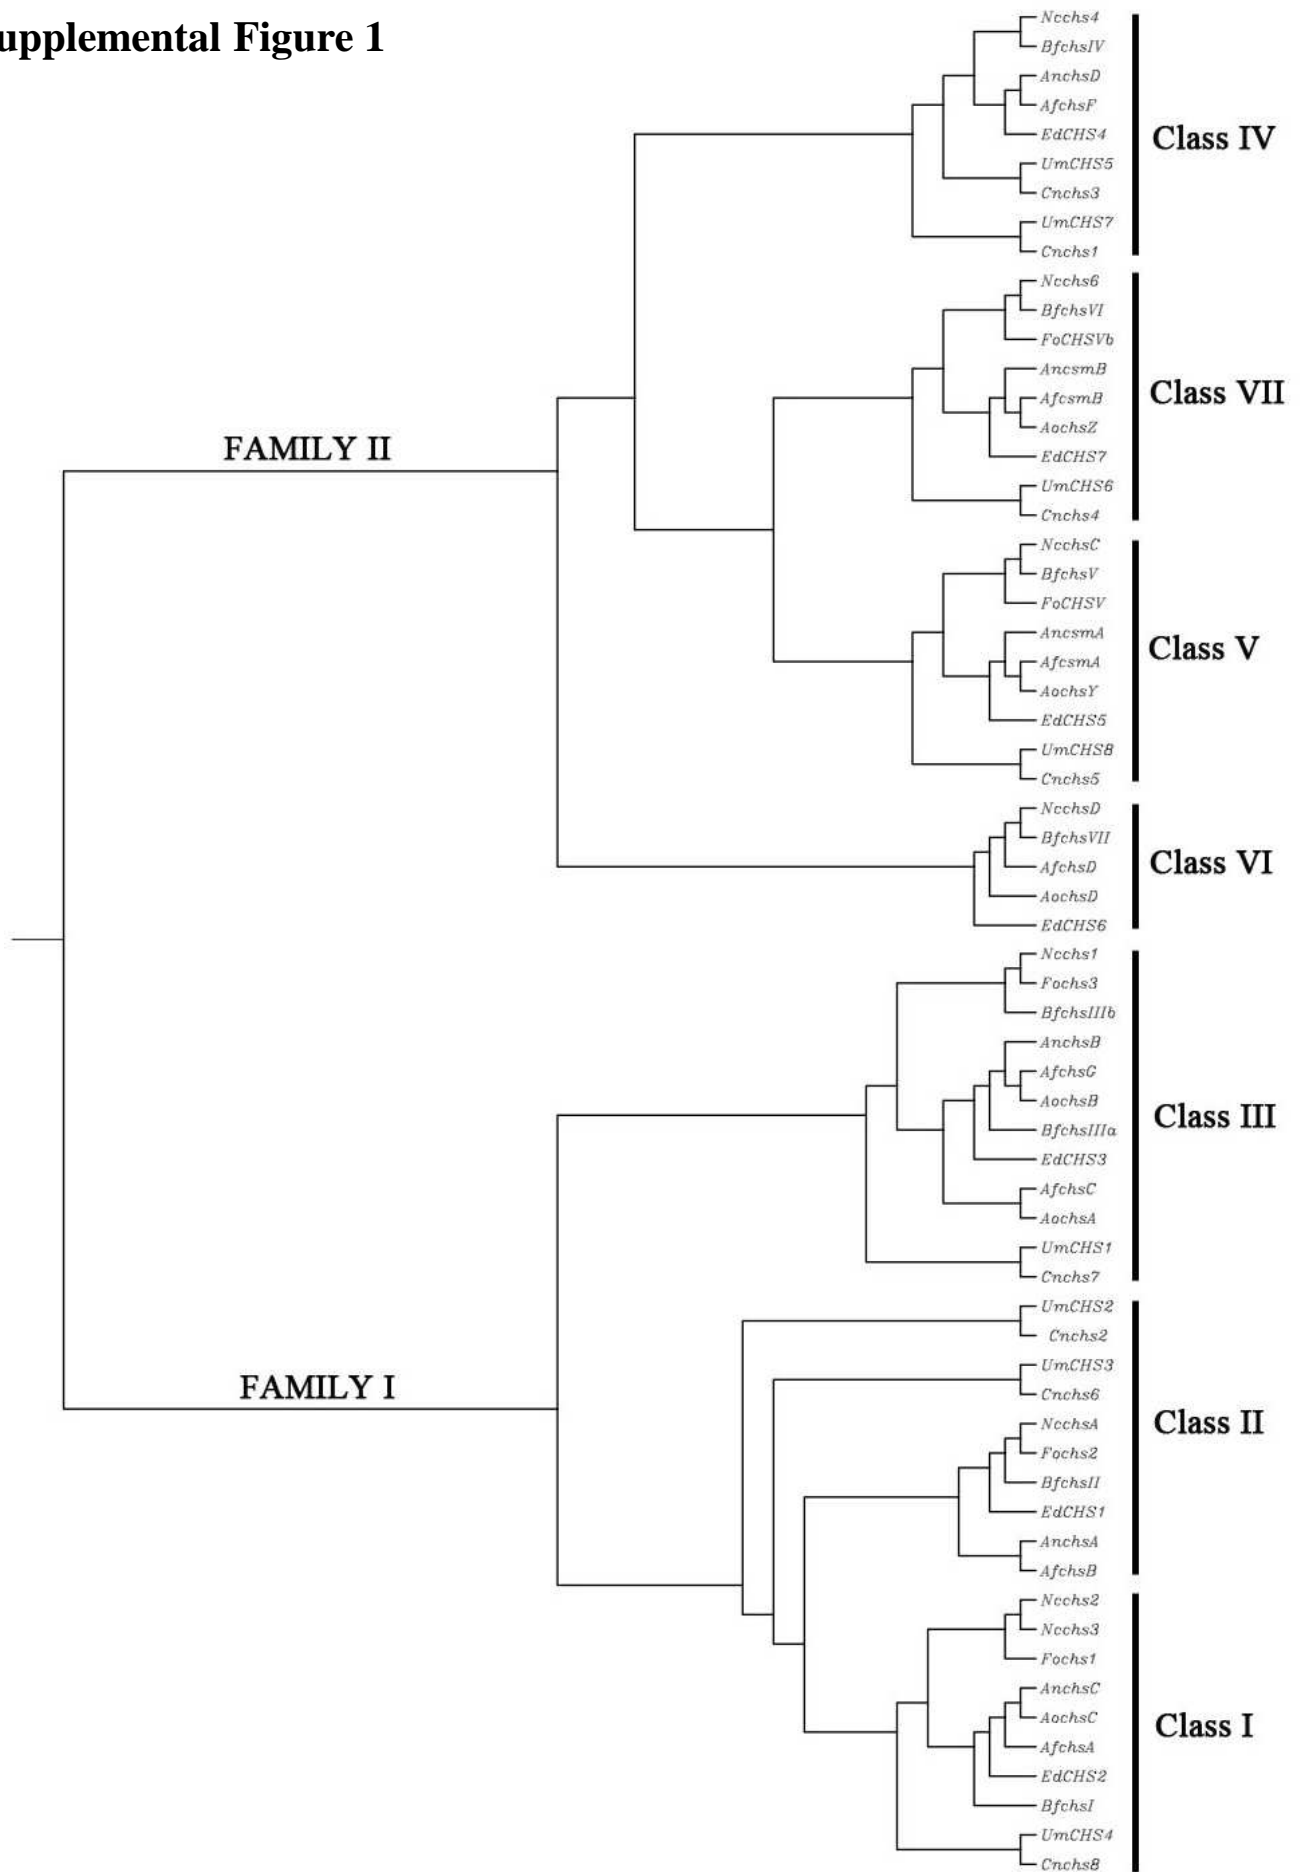

Supplemental Figure 2

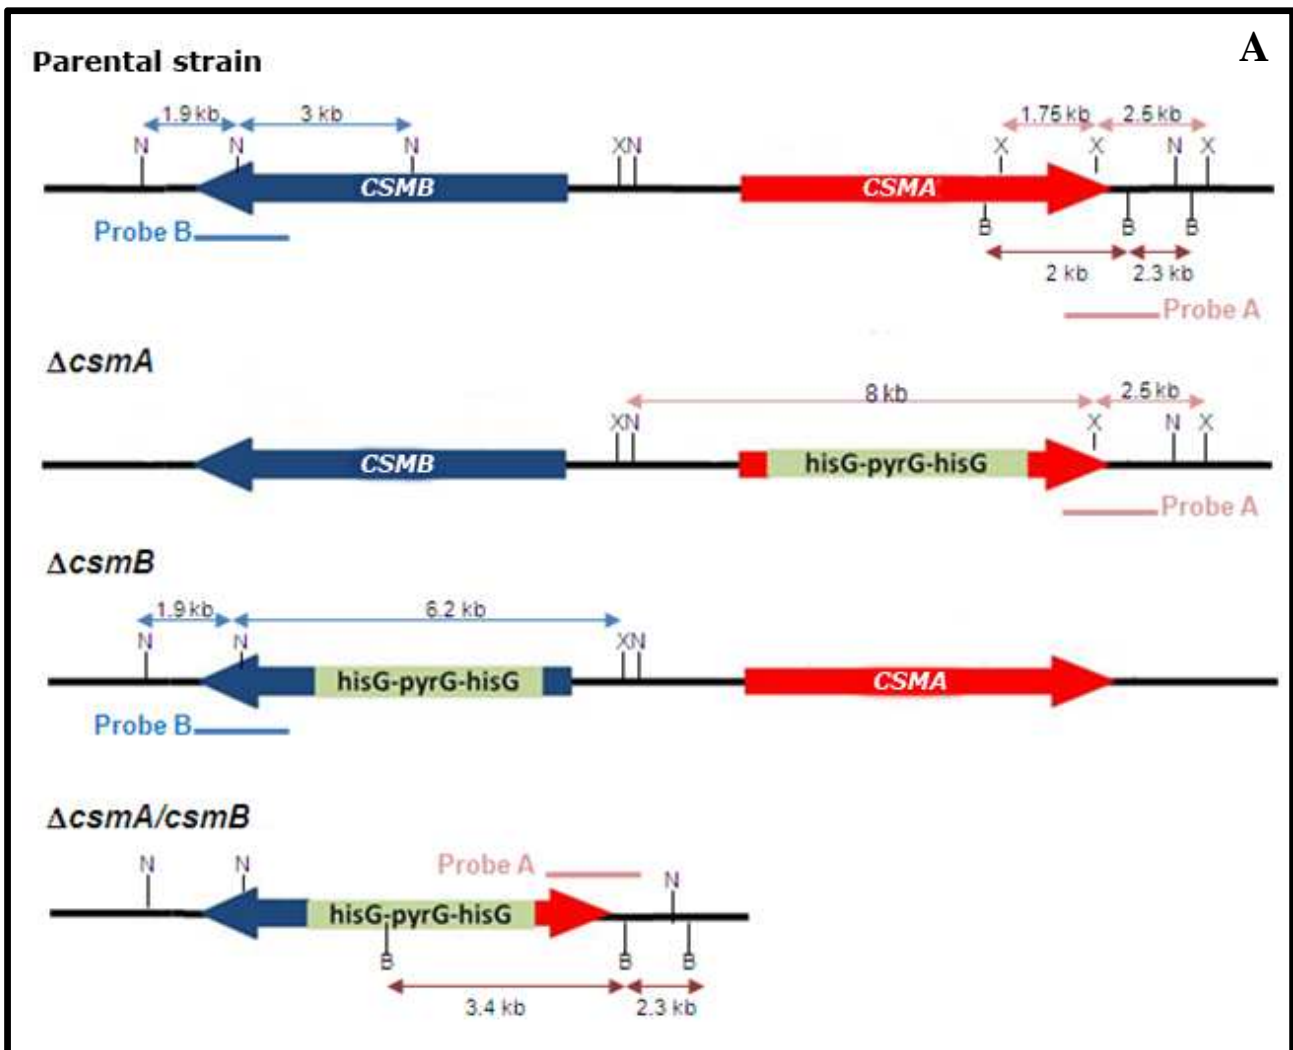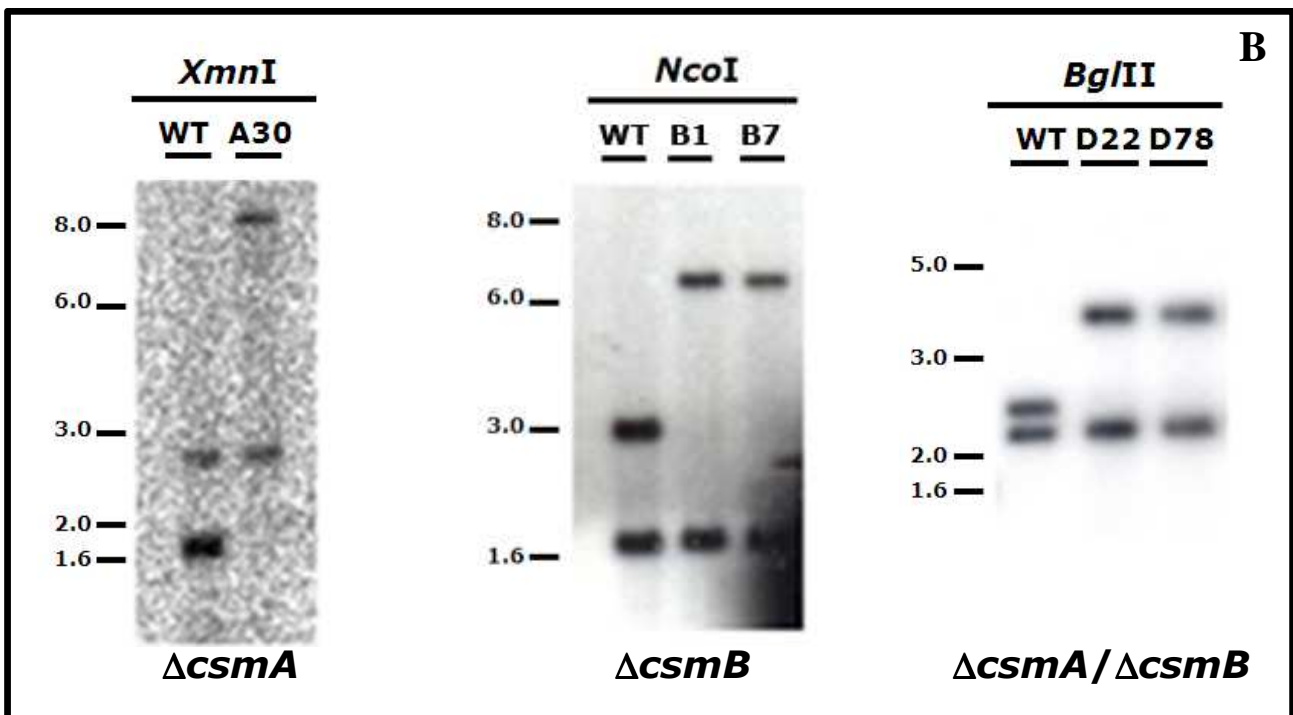

# Supplemental Figure 3

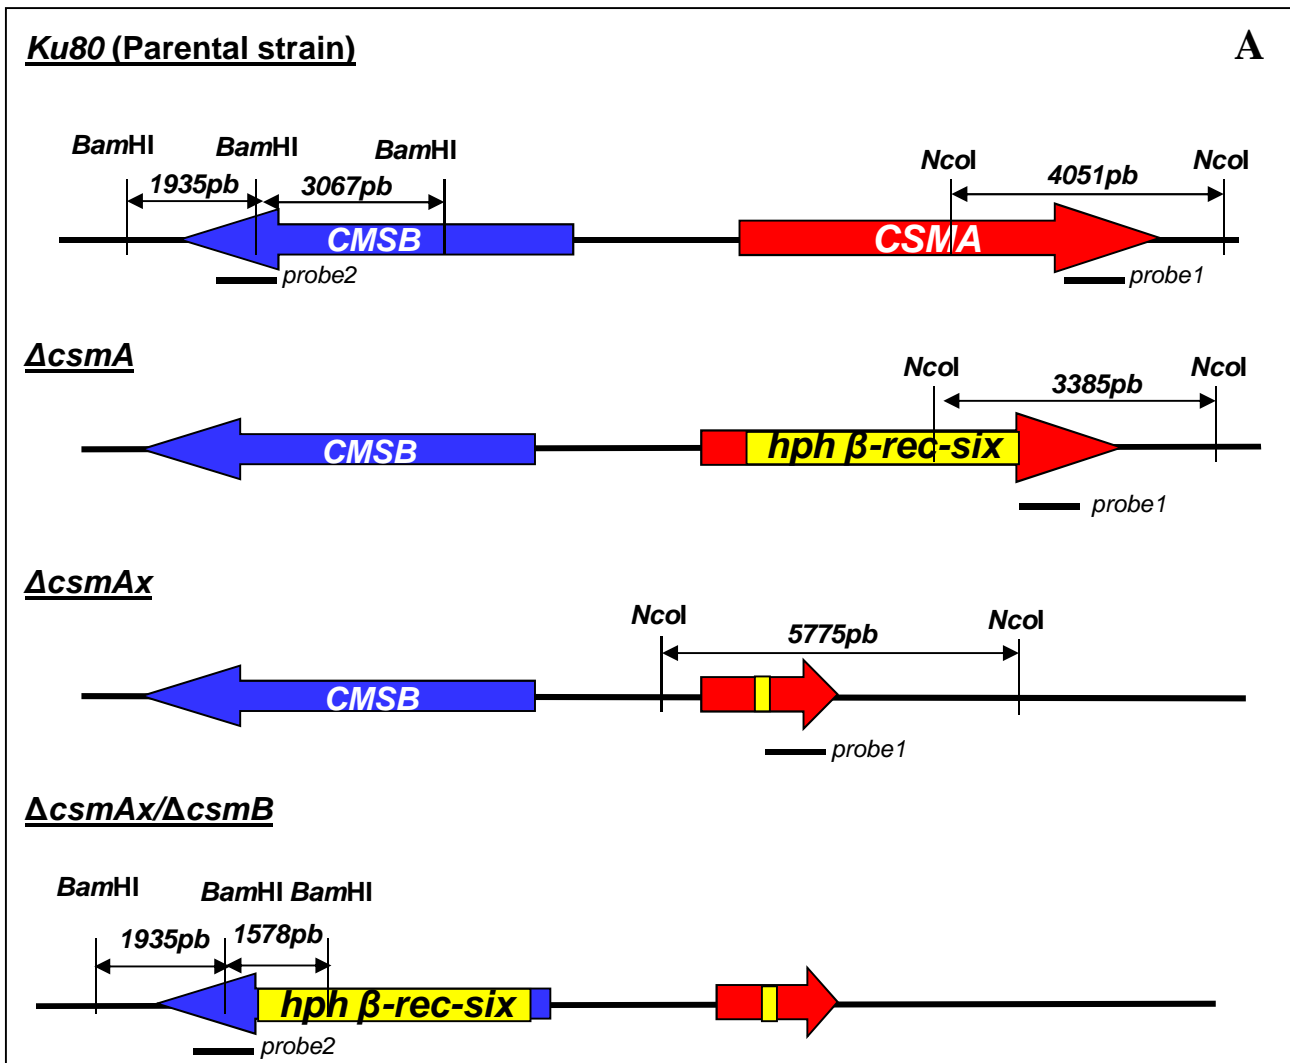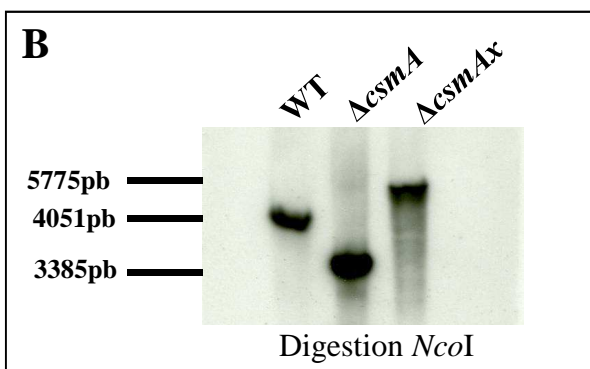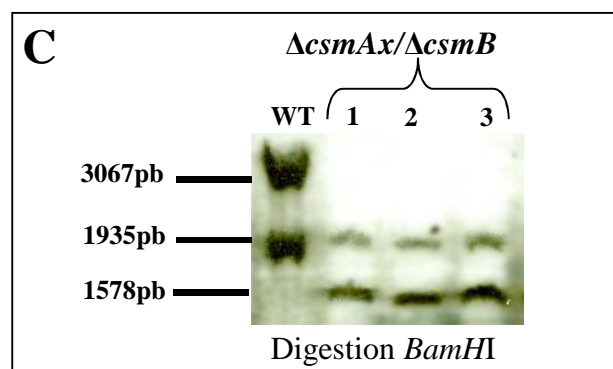

Supplemental Figure 4

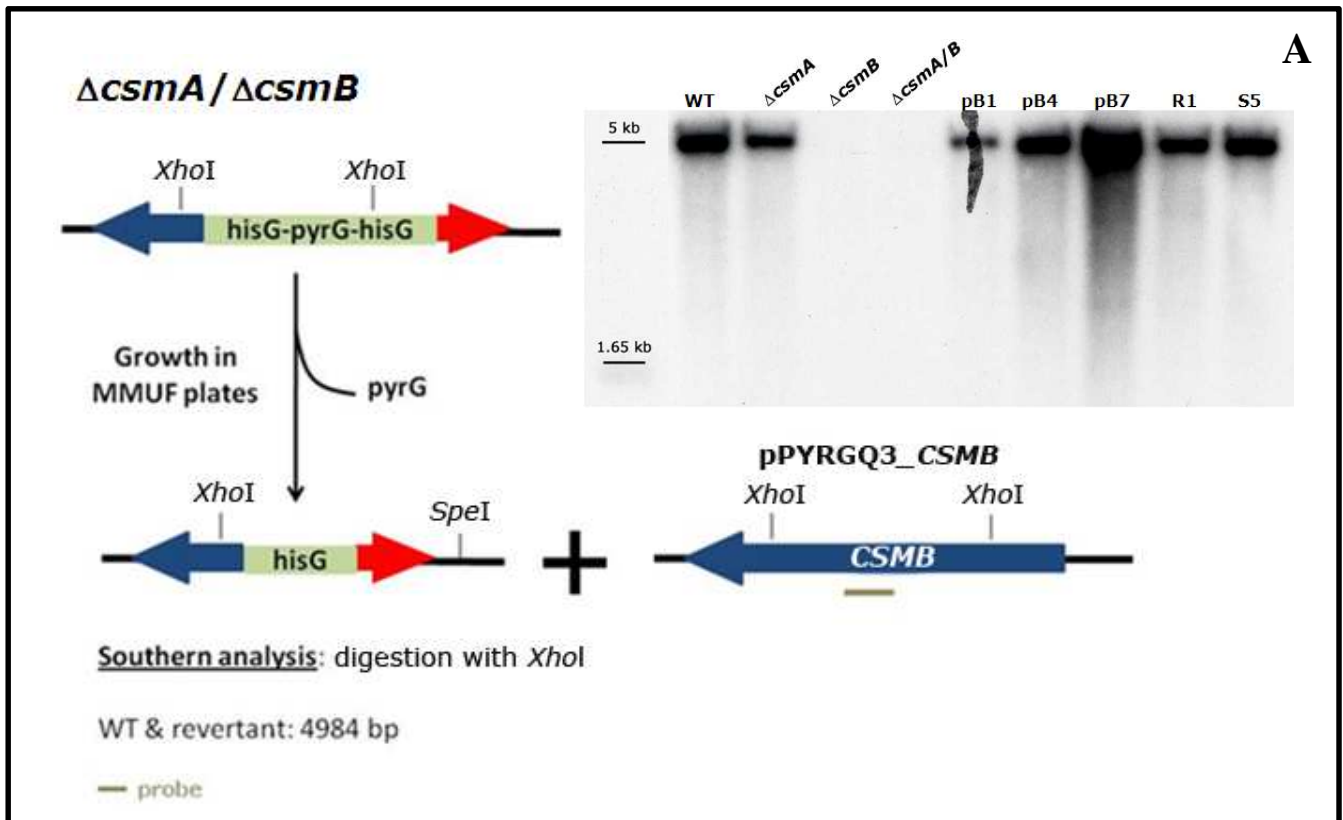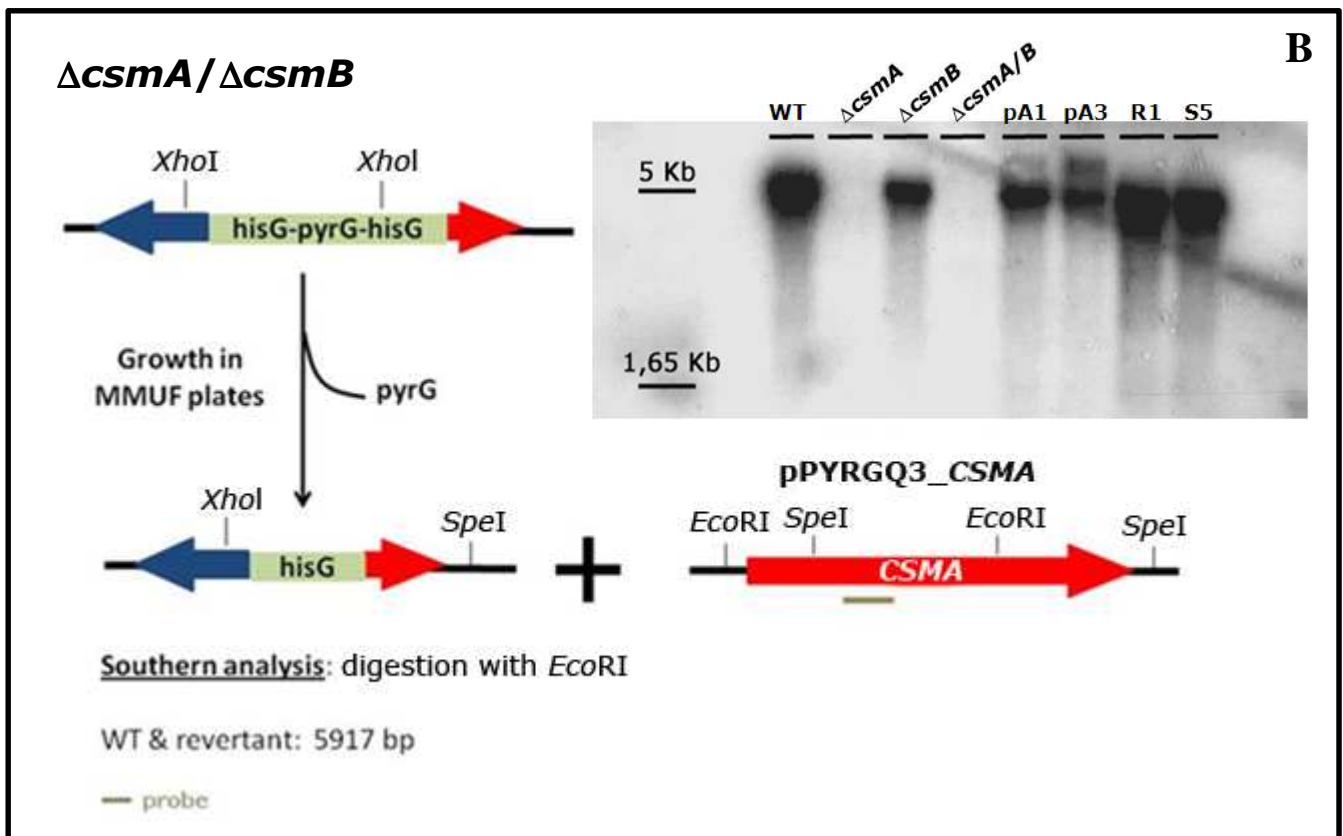



# Supplemental Figure 5

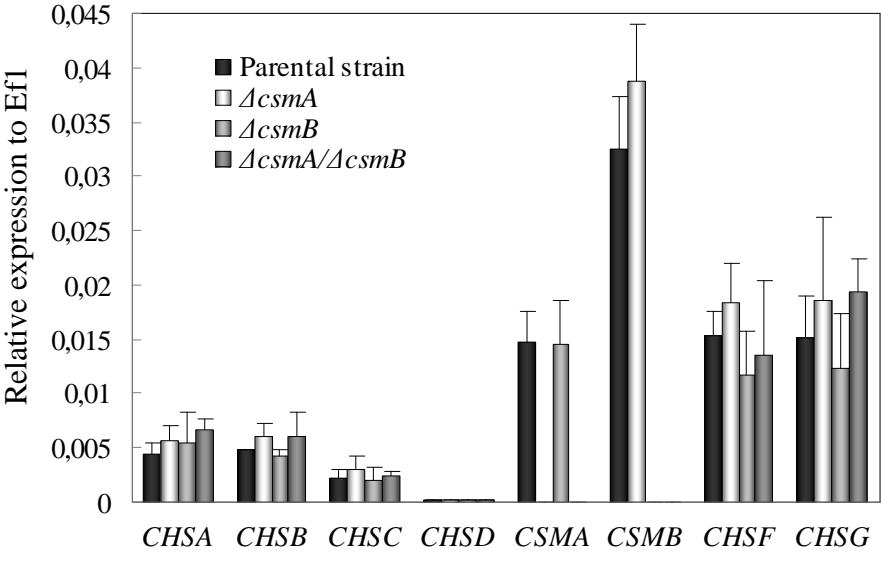

# Supplemental Figure 6

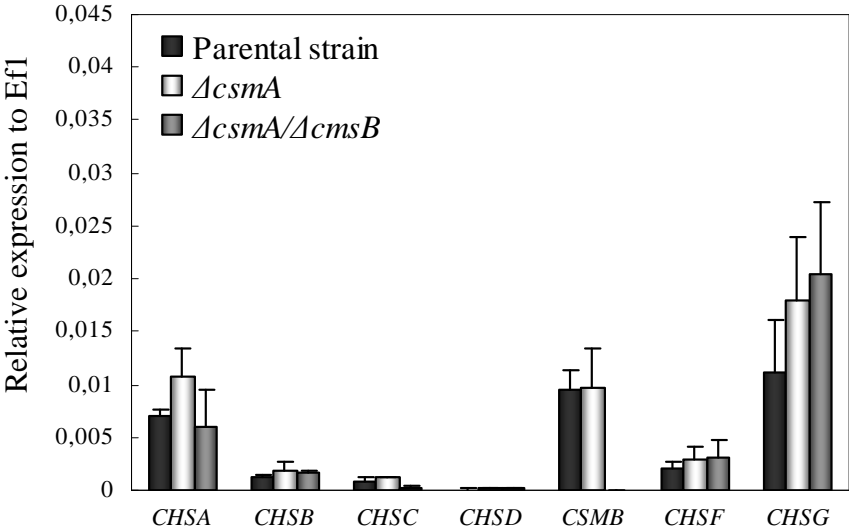

Supplemental Figure 7

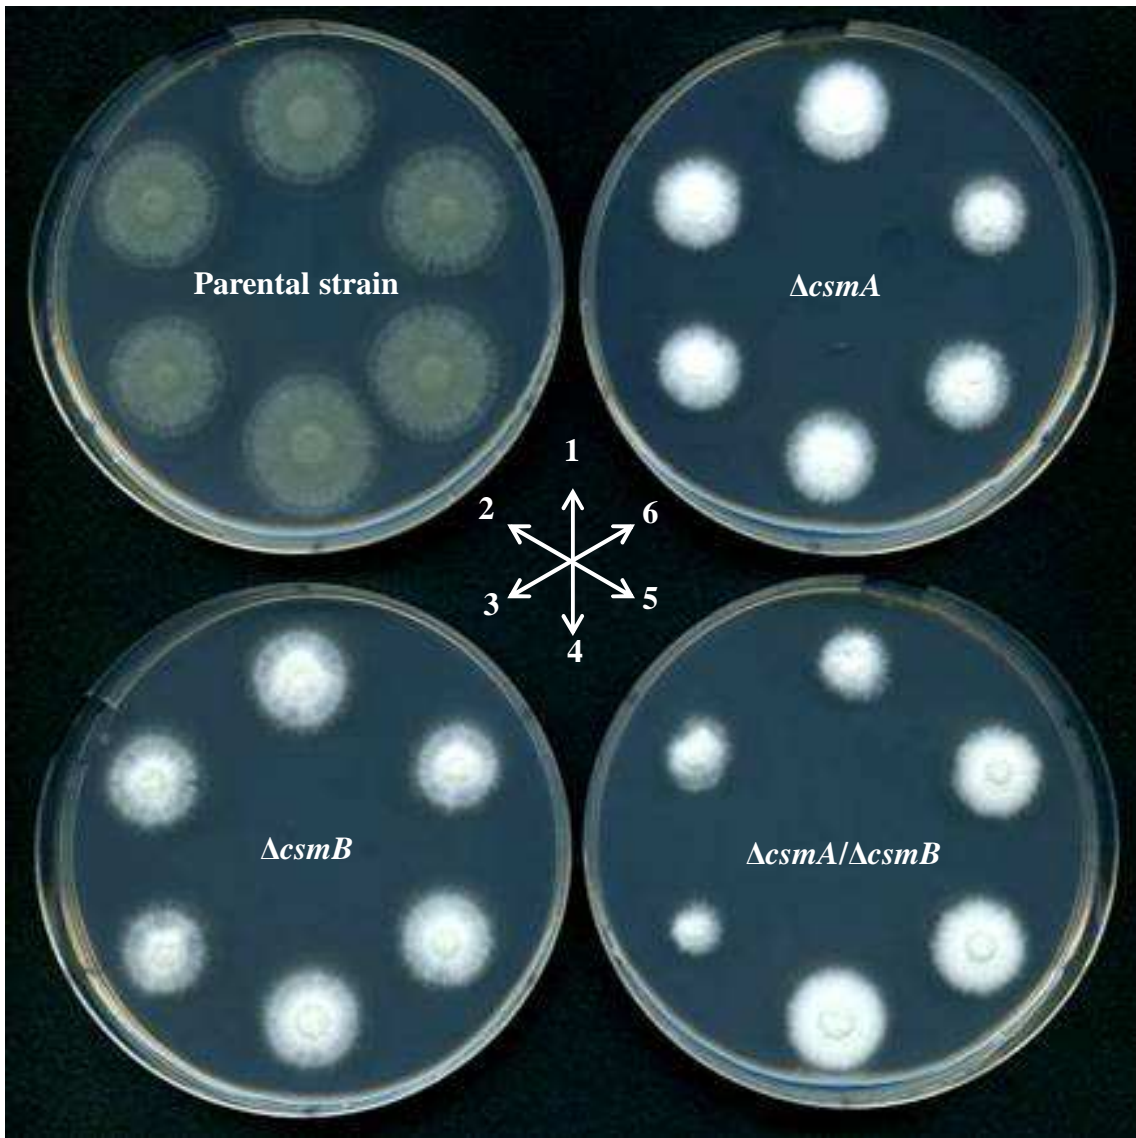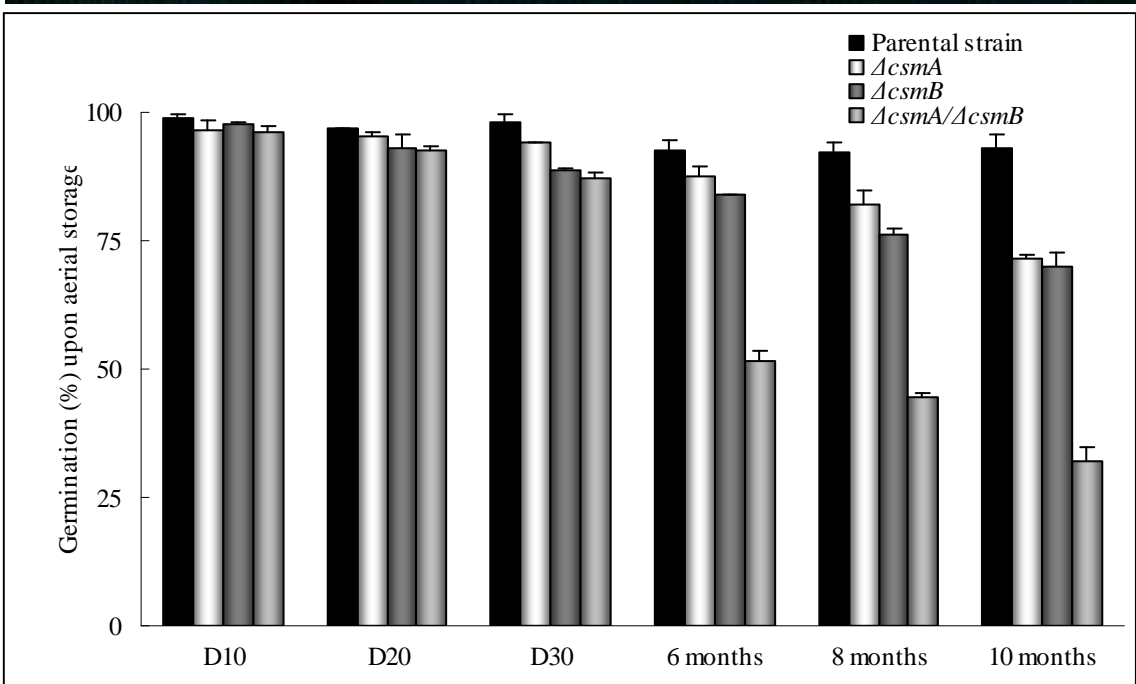

# Supplemental Figure 8

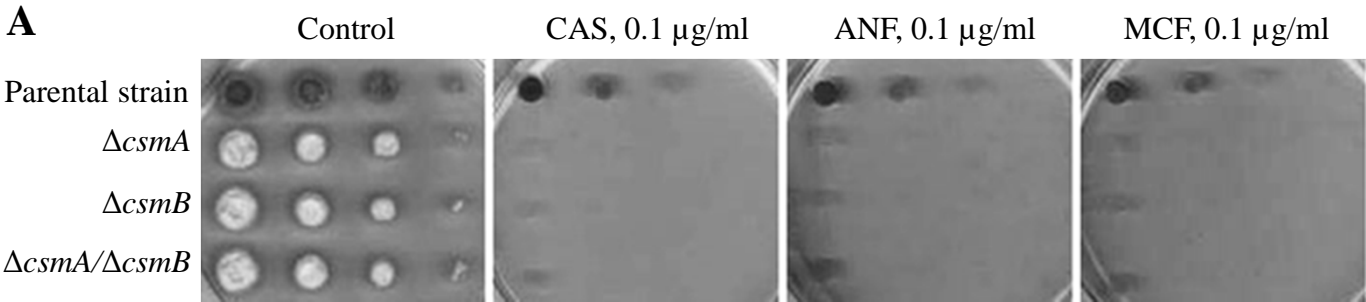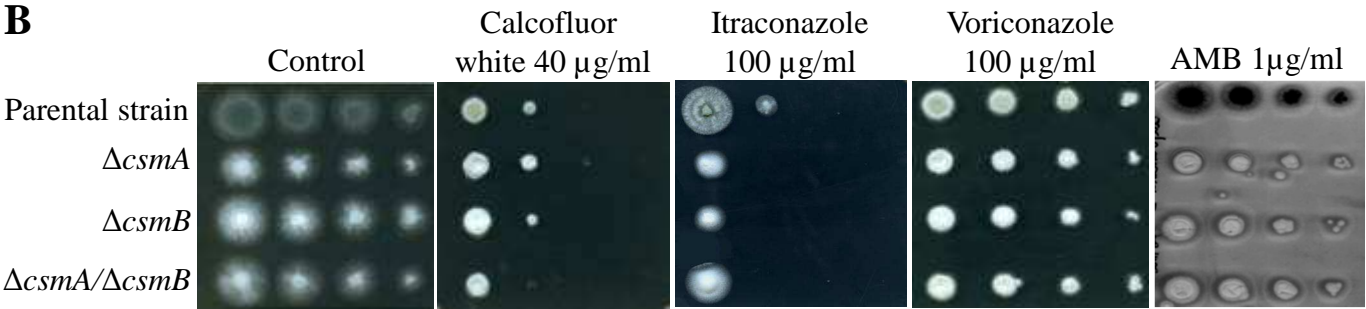

# Supplemental Figure 9

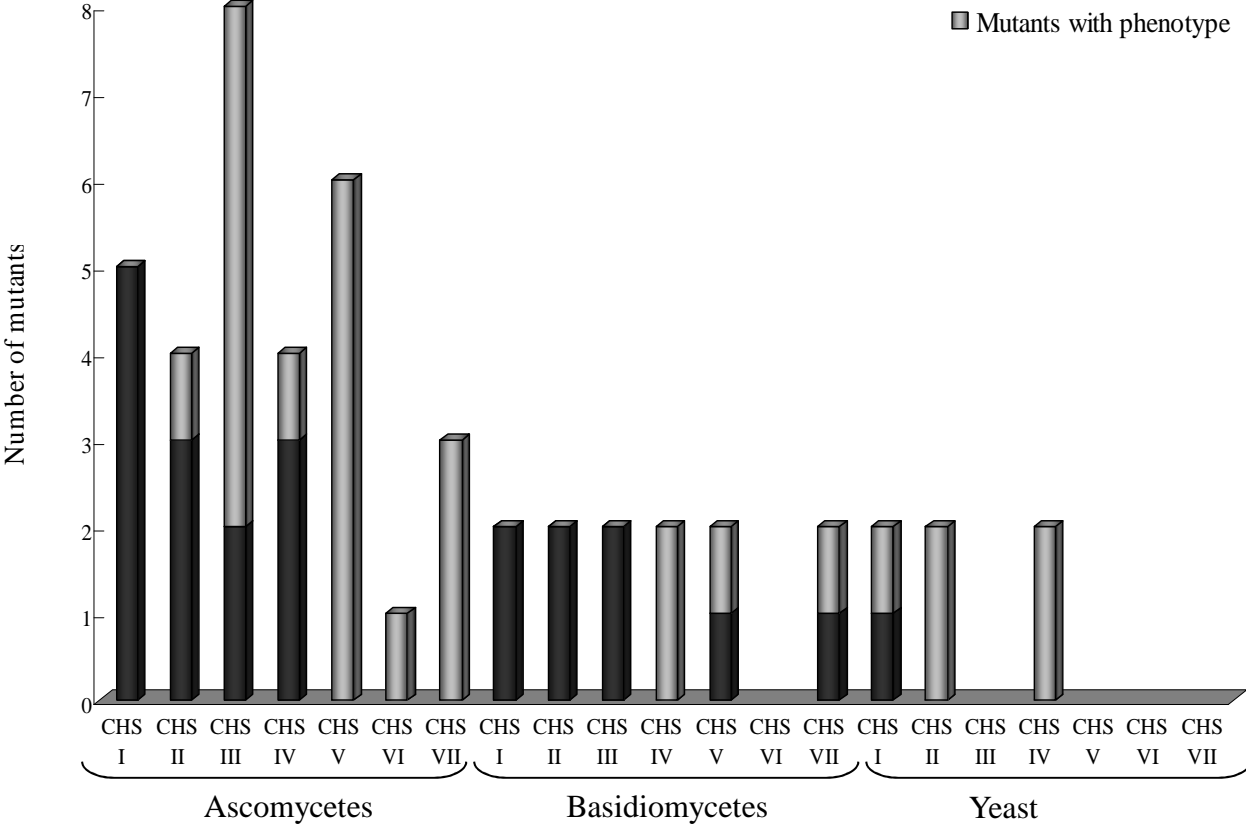

Supplement: AAC.00752-12_zac999101388so1.pdf [file AAC.00752-12_zac999101388so1.pdf]
